# Supplementary material for: Determination of hydroxyl rate constants by a high-throughput fluorimetric assay: towards a unified reactivity scale for antioxidants
Source: Royal Society of Chemistry journal article supplement (doi:10.1039/b813871k), 2008-11-19
Supplement: b813871k.pdf [file b813871k.pdf]

**Supporting information.**

**Determination of HO• rate constants by a High-Throughput Fluorimetric Assay  
Towards an unified reactivity scale for antioxidants**

**Guillaume Louit<sup>a</sup>, Mikael Hanedanian<sup>c</sup>, Frédéric Taran<sup>c</sup>, Hervé Coffigny<sup>b</sup>,  
Jean Philippe Renault<sup>a,d</sup> and Serge Pin<sup>a,d</sup>**

<sup>a</sup>CEA Saclay, IRAMIS, SCM, Laboratoire de Radiolyse, F-91191 - Gif sur Yvette Cedex

<sup>b</sup>CEA Fontenay aux Roses, DSV/iRCM/SEGG 92265-Fontenay aux Roses Cedex

<sup>c</sup>CEA Saclay, DSV/iBiTec-S/SCBM, 91191 - Gif sur Yvette Cedex

<sup>d</sup>CNRS, URA 311, F-91191 - Gif sur Yvette Cedex

**Figure S1** : determination of the reaction rate of coumarin with HO•

**Figure S2** : organisation of a microplate

**Figure S3** : set of molecules used to validate the method

**Figure S4** : determination of the reaction rate of methacrylate with HO•

**Figure S-1**

The apparent rate constant of HO<sup>•</sup> with coumarin was determined following the absorption at 350 nm of the hydroxycyclohexadienyl radical, produced by the addition of HO<sup>•</sup> on the B ring of coumarin

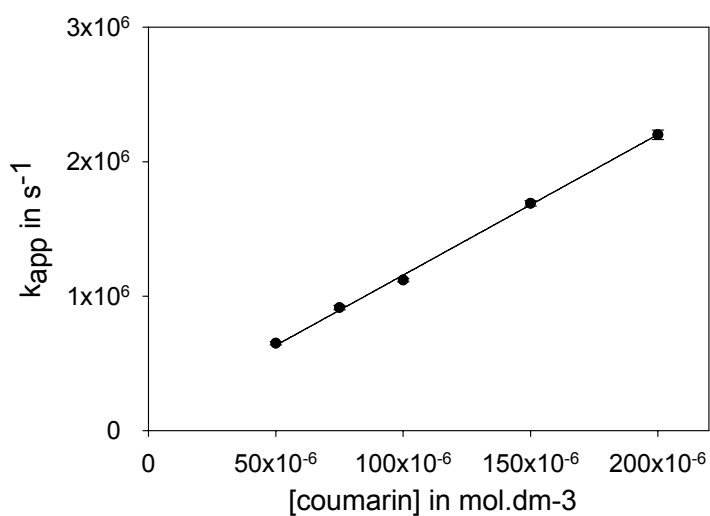

*figure S-1 – Dependence of the rate  $k_{app}$  of formation of the hydroxycyclohexadienyl radical on the coumarin concentration.  $k_{app}$  were determined from monoexponential fit of the transient absorbance measured at 350nm*

### Figure S2

On figure S-2 is displayed the plate organisation. Molecules are treated 8 at a time over the different lines of the microplates, and successive dilutions are then conducted along the lines. Columns 1 and 12 are left with water, 2 and 11 are standards containing coumarin only.

|       |                          |     |                            |  |  |  |  |  |                          |       |
|-------|--------------------------|-----|----------------------------|--|--|--|--|--|--------------------------|-------|
| water | standard (coumarin only) | A1  | decreasing concentration → |  |  |  |  |  | standard (coumarin only) | water |
|       |                          | A2  |                            |  |  |  |  |  |                          |       |
|       |                          | A3  |                            |  |  |  |  |  |                          |       |
|       |                          | --- |                            |  |  |  |  |  |                          |       |
|       |                          | --- |                            |  |  |  |  |  |                          |       |
|       |                          | Ai  |                            |  |  |  |  |  |                          |       |
|       |                          |     |                            |  |  |  |  |  |                          |       |
|       |                          |     |                            |  |  |  |  |  |                          |       |

*Figure S-2 : Microplate organisation*

**Figure S3**

*Set of molecules used to validate the screening method*

**Dithiothreitol**

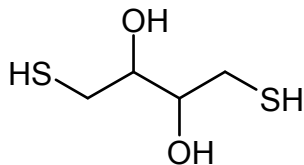

**3-mercaptopropionate:**

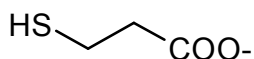

**Cysteine:**

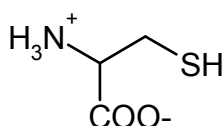

**2-mercaptoethanol:**

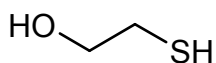

**Glutathion**

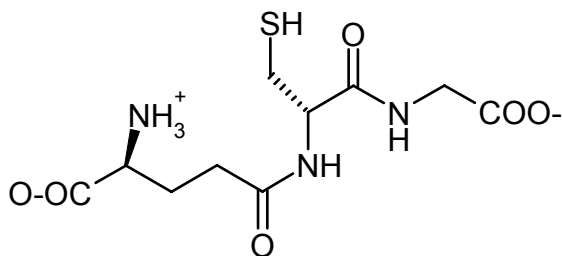

**4-hydroxy-3,5 dimethoxycinnamate**

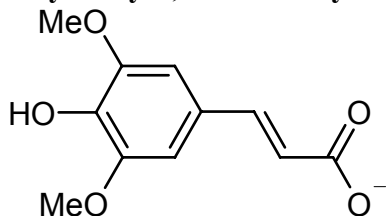

**Méthionine**

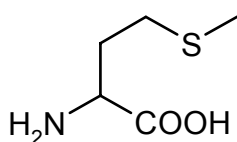

**Cystéamine:**

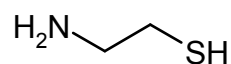

**Methacrylate:**

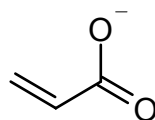

**Cinnamate**

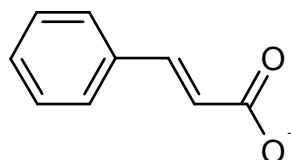

**Thiourea**

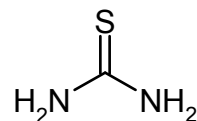

**Thiocyanate**

SCN<sup>-</sup>

**Phénol**

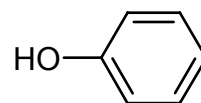

**Benzoate**

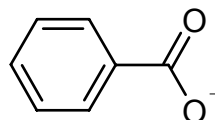

**4-hydroxy-3-methoxycinnamate**

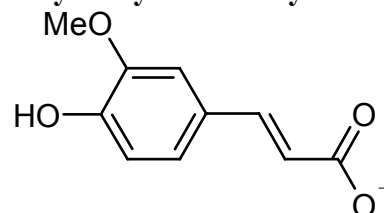

**Dimethylsulfoxide**

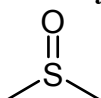

**4-hydroxy-3-methoxybenzoate (vanillate)**

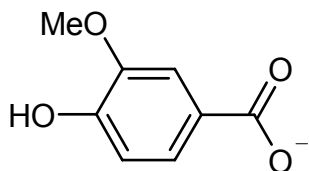

**Thymine**

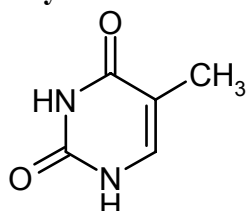

**Urate**

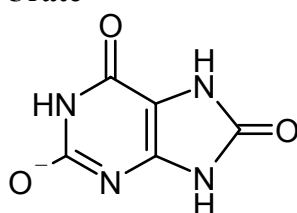

**3,4-dihydroxycinnamate (caffeate)**

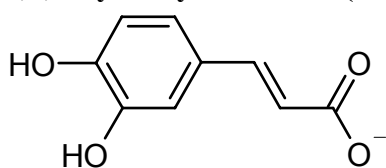

**4-Hydroxy-3,5-dimethoxybenzoate**

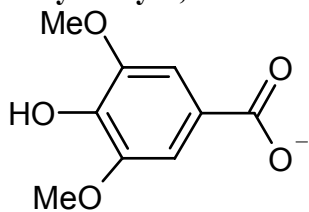

**Adenine**

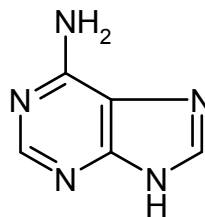

**3,3-dimethylacrylate**

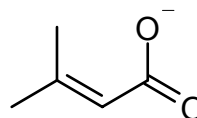

**4-hydroxycinnamate**

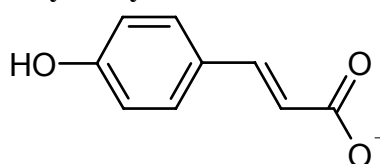

**5,5-dimethyl-1-pyrroline N-oxide (DMPO)**

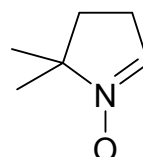

**Ribose:**

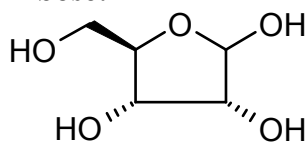

**Oxalate**

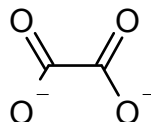

**Ascorbate**

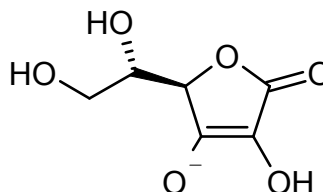

### Figure S4

The apparent rate constant of HO<sup>•</sup> with methacrylate was determined following the absorption at 320 nm of the radical, produced by the addition of HO<sup>•</sup> on this compound. (figure S3)

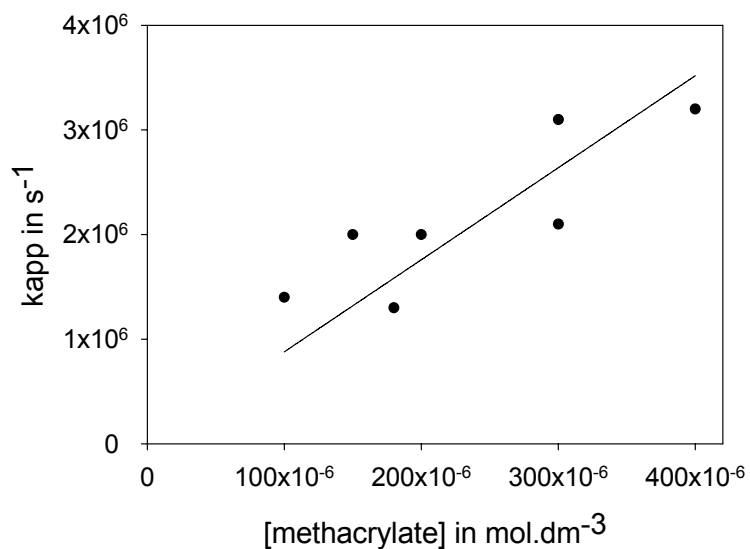

Figure S-4 : Dependence of the rate  $k_{app}$  of formation of the hydroxymethacryl radical on the methacrylate concentration.  $k_{app}$  were determined from monoexponential fit of the transient absorbance measured at 320nm
